# Supplementary material for: pH-sensitive drug release of star-shaped micelles with OEG brush corona
Source: Royal Society of Chemistry journal article supplement (doi:10.1039/c6ra21408h), 2016-01-01
Supplement: c6ra21408h1.pdf [file c6ra21408h1.pdf]

*Supporting Information*  
*of*

**pH-Sensitive Drug Release of Star-shaped Micelles  
with OEG Brush Corona**

Sijie Zhao, Huiru Yang, Cai Zuo, Lu Sun, Liwei Ma\*, and Hua Wei\*

State Key Laboratory of Applied Organic Chemistry, Key Laboratory of Nonferrous  
Metal Chemistry and Resources Utilization of Gansu Province, and  
College of Chemistry and Chemical Engineering, Lanzhou University, Lanzhou,  
Gansu 730000, China

- 1. Table S1-S3**
- 2. Figure S1-S4**

**Table S1.** The amount of each reagent used for the synthesis of 3s- and 6s-PCL-OH.

| Polymer   | Initiator (3/6s-OH)  | Monomer ( $\epsilon$ -CL) | Catalyst (Sn(Oct) <sub>2</sub> ) |
|-----------|----------------------|---------------------------|----------------------------------|
| 3s-PCL-OH | 1 mmol<br>(0.1094 g) | 30 mmol<br>(3.4588 g)     | 0.06 mmol<br>(24.3 mg)           |
| 6s-PCL-OH | 1 mmol<br>(0.2825 g) | 60 mmol<br>(6.9176 g)     | 0.12 mmol<br>(48.6 mg)           |

**Table S2.** The amount of each reagent used for the synthesis of 3s- and 6s-PCL-iBuBr.

| Polymer      | 3/6s-PCL-OH            | 2-Bromoisobutyryl bromide | TEA                      | Solvent (DCM) |
|--------------|------------------------|---------------------------|--------------------------|---------------|
| 3s-PCL-iBuBr | 0.39 mmol<br>(1.000 g) | 3.53 mmol<br>(0.8290 g)   | 4.59 mmol<br>(0.4696 mg) | 8 ml          |
| 6s-PCL-iBuBr | 0.17 mmol<br>(1.000 g) | 3.13 mmol<br>(0.7339 g)   | 4.07 mmol<br>(0.4157 mg) | 12 ml         |

**Table S3.** The amount of each reagent used for the synthesis of 3s- and 6s-PCL-POEGMA.

| Polymer       | Initiator (3/6s-PCL-iBuBr) | Monomer (OEGMA)         | Catalyst (CuBr)          | Ligand (bpy)              | Solvent (anisole) |
|---------------|----------------------------|-------------------------|--------------------------|---------------------------|-------------------|
| 3s-PCL-POEGMA | 0.0118 mmol<br>(30 mg)     | 3.53 mmol<br>(1.0602 g) | 35 $\mu$ mol<br>(5.1 mg) | 71 $\mu$ mol<br>(11.3 mg) | 3.534 ml          |
| 6s-PCL-POEGMA | 0.0053 mmol<br>(30 mg)     | 3.20 mmol<br>(0.9594 g) | 32 $\mu$ mol<br>(4.6 mg) | 64 $\mu$ mol<br>(10.2 mg) | 3.198 ml          |

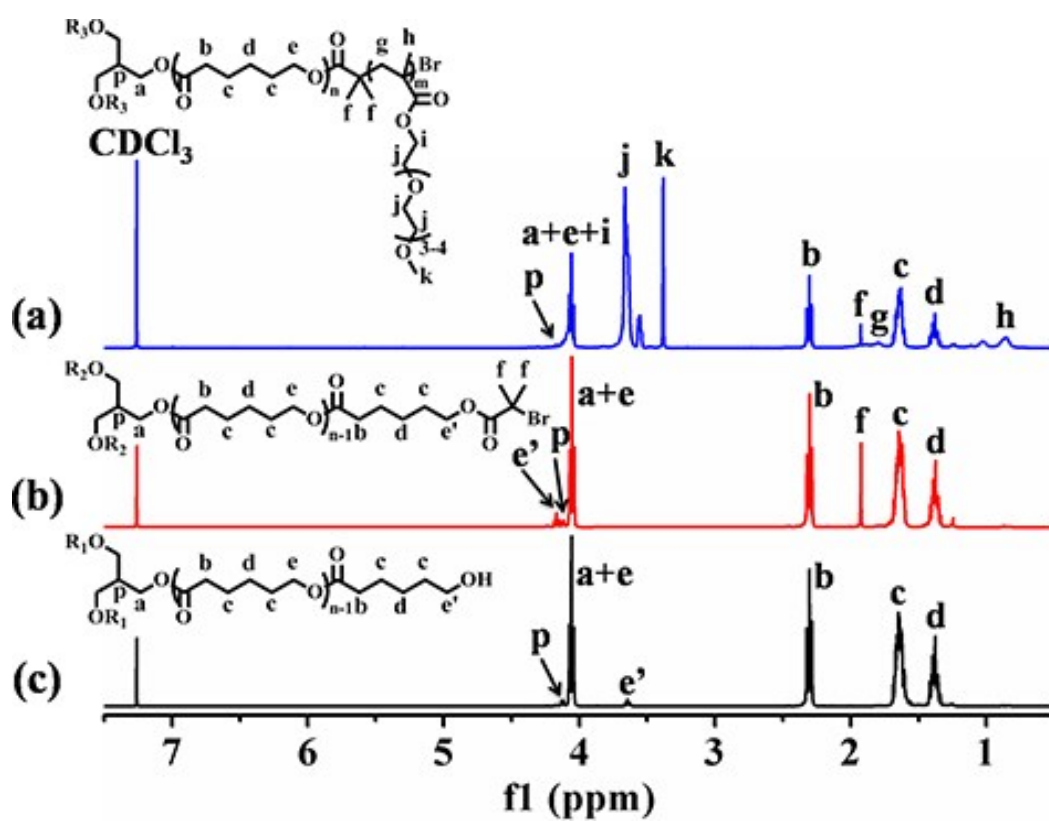

**Figure S1.** The  $^1\text{H}$  NMR spectra of (a) 3s-PCL-OH, (b) 3s-PCL-Br and (c) 3s-PCL-POEGMA.

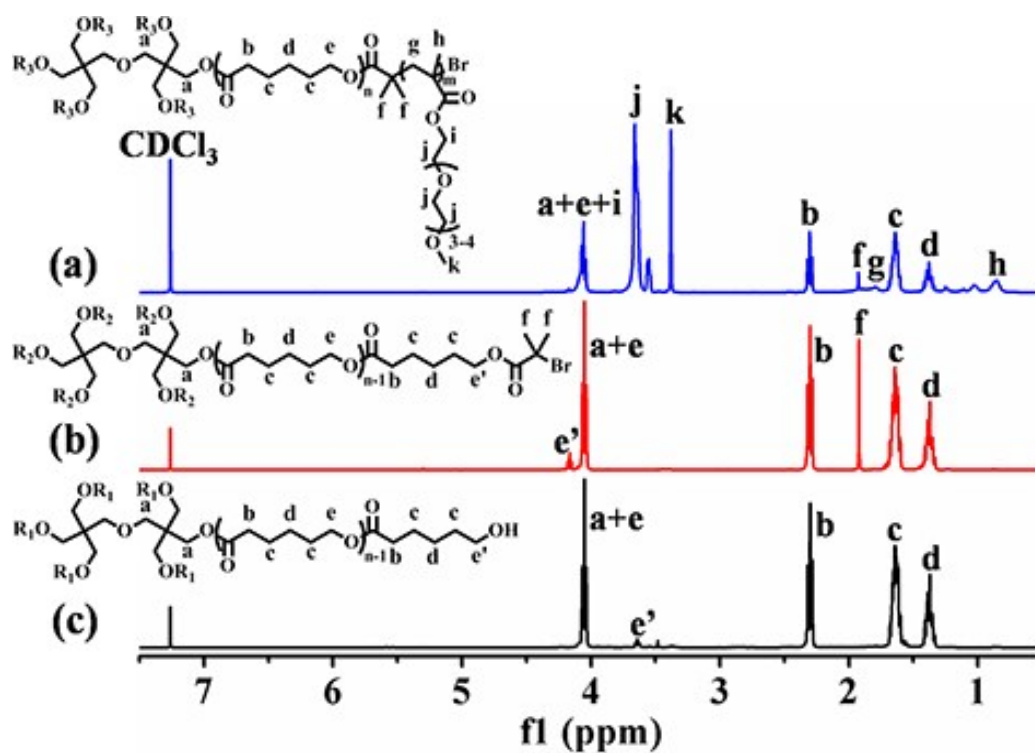

**Figure S2.** The  $^1\text{H}$  NMR spectra of (a) 6s-PCL-OH, (b) 6s-PCL-Br and (c) 6s-PCL-POEGMA.

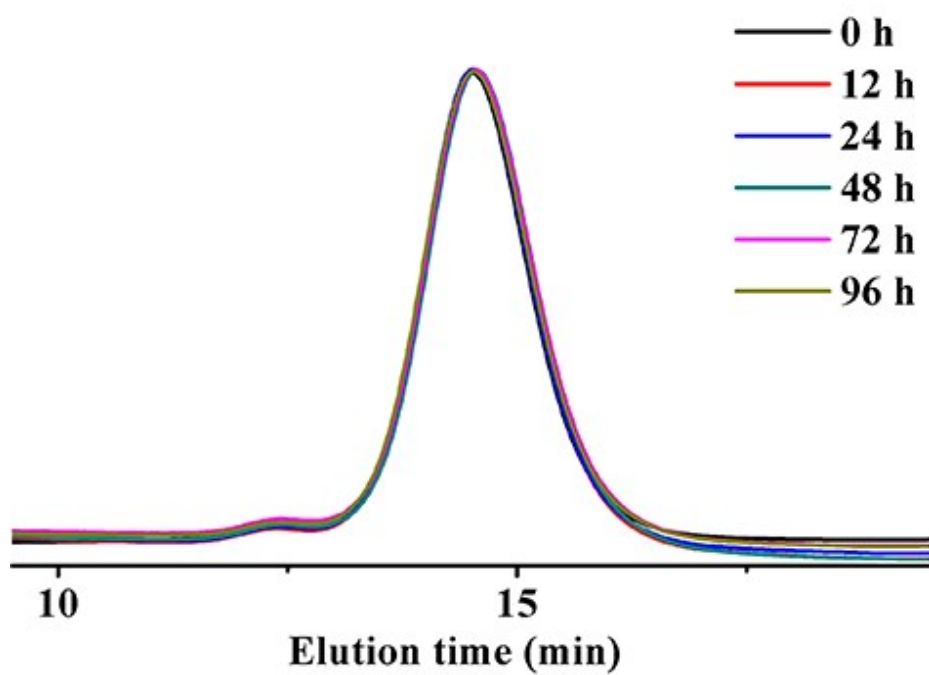

**Figure S3.** GPC elution traces of 4s-PCL-POEGMA recorded at different time points in an acid-triggered degradation study.

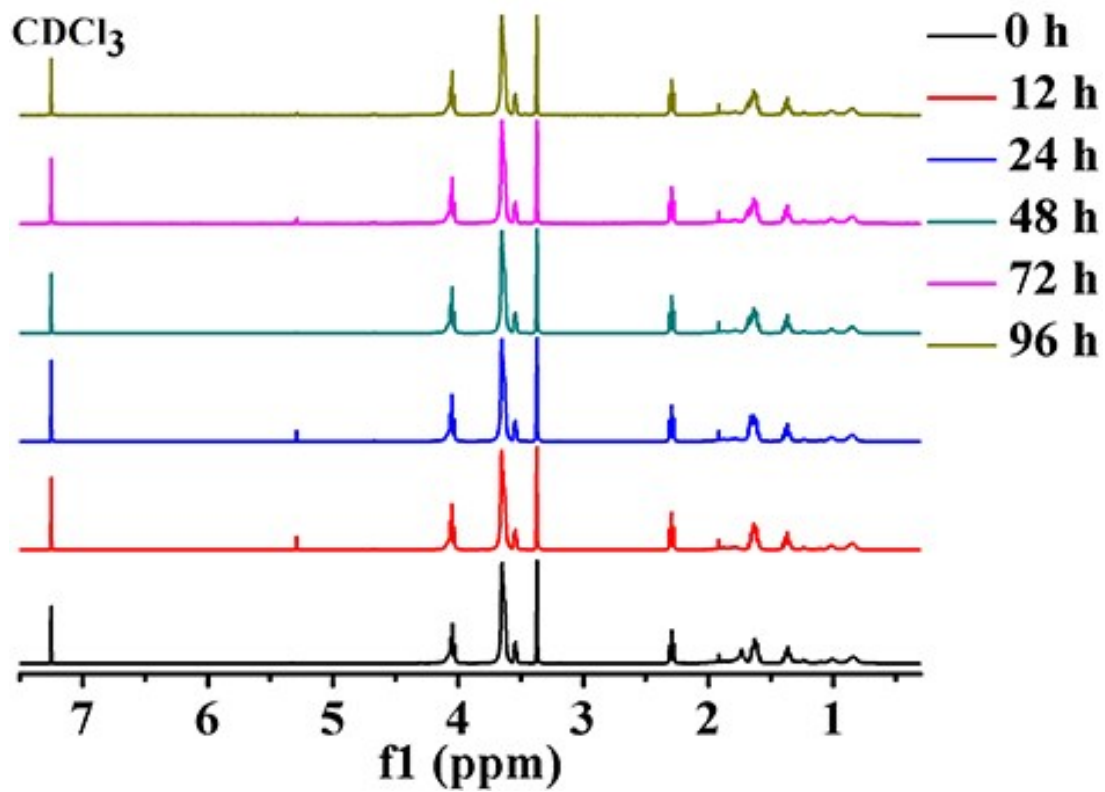

**Figure S4.** <sup>1</sup>H NMR spectra of 4s-PCL-POEGMA recorded at different time points in an acid-triggered degradation study.
